# Supplementary material for: Response of Brassica napus to Plasmodiophora brassicae Involves Salicylic Acid-Mediated Immunity: An RNA-Seq-Based Study
Source: Front Plant Sci. 2020 Jul 9;11:1025. doi: 10.3389/fpls.2020.01025 (PMC7367028; doi:10.3389/fpls.2020.01025)
Supplement: Supplementary file 9 [file Table_5.xlsx]

## Sheet: shared genes
Supplementary Table S5. Shared genes between genotypes and time points, and enrichment analysis functional categories.
Comparison	Number of genes shared
LA7UP VS BR7UP	637
LA7DOWN VS BR7DOWN	473
LA14UP VS BR14UP	205
LA14DOWN VS BR14DOWN	191
LA21UP VS BR21UP	253
LA21DOWN VS BR21DOWN	967
LA7UP VS BR14UP	164
LA7DOWN VS BR14DOWN	181
LA14UP VS BR21UP	108
LA14DOWN VS BR21DOWN	346
BR7UP VS LA14UP	227
BR7DOWN VS LA14DOWN	105
BR14UP VS LA21UP	247
BR14DOWN VS LA21DOWN	445

## Sheet: LA14UP-BR14UP VS BR14UP-LA21UP
Functional Biological Process level 3 categories from DAVID (minimum count 5, EASE < 0.05): Shared upregulated genes between Laurentian (LA) and Brutor (BR) at 14 dai were used for enrichment analysis and the resulting categories were compared with the categories resulting from shared upregulated genes from Brutor at 14 dai and Laurentian at 21 dai. Duplicated categories are highlighted.
LA14UP-BR14UP	BR14UP-LA21UP
GO:0005975~carbohydrate metabolic process	GO:0010876~lipid localization
GO:0043207~response to external biotic stimulus	GO:0006949~syncytium formation
GO:0010876~lipid localization	GO:0043207~response to external biotic stimulus
GO:0006082~organic acid metabolic process	GO:0010035~response to inorganic substance
GO:0044248~cellular catabolic process	GO:0009415~response to water
GO:0006952~defense response	GO:0045229~external encapsulating structure organization
GO:0098542~defense response to other organism	GO:0005975~carbohydrate metabolic process
GO:0044281~small molecule metabolic process	GO:0009414~response to water deprivation
GO:0044712~single-organism catabolic process	GO:0071555~cell wall organization
GO:0006520~cellular amino acid metabolic process	GO:0048646~anatomical structure formation involved in morphogenesis
GO:0010119~regulation of stomatal movement	GO:0098542~defense response to other organism
GO:0010035~response to inorganic substance	GO:0072593~reactive oxygen species metabolic process
GO:0006970~response to osmotic stress	GO:0009826~unidimensional cell growth
GO:0009415~response to water	GO:0001101~response to acid chemical
GO:1901700~response to oxygen-containing compound	GO:1901700~response to oxygen-containing compound
GO:0055114~oxidation-reduction process	GO:0071669~plant-type cell wall organization or biogenesis
GO:0072593~reactive oxygen species metabolic process	GO:0055114~oxidation-reduction process
GO:1901575~organic substance catabolic process	GO:0006952~defense response
GO:0001101~response to acid chemical	GO:0060560~developmental growth involved in morphogenesis
GO:0009414~response to water deprivation	GO:0010033~response to organic substance
GO:0006979~response to oxidative stress	GO:0016049~cell growth
GO:0009620~response to fungus	GO:0009725~response to hormone
GO:0010033~response to organic substance	GO:1903047~mitotic cell cycle process
GO:0019748~secondary metabolic process	GO:0009620~response to fungus
GO:0045087~innate immune response	GO:0044262~cellular carbohydrate metabolic process

## Sheet: LA14DW-BR14DW VS LA14DW-BR21DW
Functional Biological Process level 3 categories from DAVID (minimum count 5, EASE < 0.05): Shared downregulated genes between Laurentian (LA) and Brutor (BR) at 14 dai were used for enrichment analysis and the resulting categories were compared with the categories resulting from shared downregulated genes from Laurentian at 14 dai and Brutor at 21 dai. Duplicated categories are highlighted.
LA14DW-BR14DW	LA14DW-BR21DW
GO:0019748~secondary metabolic process	GO:1901700~response to oxygen-containing compound
GO:0055114~oxidation-reduction process	GO:0001101~response to acid chemical
GO:1901700~response to oxygen-containing compound	GO:0010035~response to inorganic substance
GO:0006979~response to oxidative stress	GO:0006979~response to oxidative stress
GO:0010035~response to inorganic substance	GO:0009611~response to wounding
GO:0001101~response to acid chemical	GO:0010243~response to organonitrogen compound
GO:0010243~response to organonitrogen compound	GO:0009414~response to water deprivation
GO:1901698~response to nitrogen compound	GO:0009415~response to water
GO:0009611~response to wounding	GO:0010033~response to organic substance
GO:0006952~defense response	GO:0006952~defense response
GO:0009617~response to bacterium	GO:0009617~response to bacterium
GO:0044711~single-organism biosynthetic process	GO:0019748~secondary metabolic process
GO:0010033~response to organic substance	GO:0009408~response to heat
GO:0009414~response to water deprivation	GO:0009725~response to hormone
GO:0009415~response to water	GO:0043207~response to external biotic stimulus
GO:0010817~regulation of hormone levels	GO:1901698~response to nitrogen compound
GO:0009698~phenylpropanoid metabolic process	GO:0009266~response to temperature stimulus
GO:0009725~response to hormone	GO:0006970~response to osmotic stress
GO:0006082~organic acid metabolic process	GO:0009698~phenylpropanoid metabolic process
GO:0044281~small molecule metabolic process	GO:0071555~cell wall organization
GO:0042446~hormone biosynthetic process	GO:0098542~defense response to other organism
GO:0070887~cellular response to chemical stimulus	GO:0044765~single-organism transport
GO:0055085~transmembrane transport	GO:0006082~organic acid metabolic process
GO:0043207~response to external biotic stimulus	GO:0044281~small molecule metabolic process
GO:0006790~sulfur compound metabolic process	GO:0045229~external encapsulating structure organization
GO:0009850~auxin metabolic process	GO:0009314~response to radiation
GO:0009812~flavonoid metabolic process	GO:0055114~oxidation-reduction process
GO:0090066~regulation of anatomical structure size	GO:0080134~regulation of response to stress
GO:0032535~regulation of cellular component size	GO:0080167~response to karrikin
GO:0071495~cellular response to endogenous stimulus	GO:0009812~flavonoid metabolic process
GO:0044765~single-organism transport	GO:0044262~cellular carbohydrate metabolic process
GO:0009266~response to temperature stimulus	GO:0071495~cellular response to endogenous stimulus
GO:0009409~response to cold	GO:0044723~single-organism carbohydrate metabolic process
GO:0080134~regulation of response to stress	GO:0055085~transmembrane transport
GO:1901615~organic hydroxy compound metabolic process	GO:0044711~single-organism biosynthetic process
GO:0006970~response to osmotic stress	GO:0070887~cellular response to chemical stimulus
	GO:0007165~signal transduction
	GO:0009636~response to toxic substance
	GO:0071669~plant-type cell wall organization or biogenesis
	GO:0007154~cell communication

## Sheet: LA14DW-BR14DW VS BR14DW-LA21DW
Functional Biological Process level 3 categories from DAVID (minimum count 5, EASE < 0.05): Shared downregulated genes between Laurentian (LA) and Brutor (BR) at 14 dai were used for enrichment analysis and the resulting categories were compared with the categories resulting from shared downregulated genes from Brutor at 14 dai and Laurentian at 21 dai. Duplicated categories are highlighted.
LA14DW-BR14DW	BR14DW-LA21DW
GO:0019748~secondary metabolic process	GO:0019748~secondary metabolic process
GO:0055114~oxidation-reduction process	GO:0009611~response to wounding
GO:1901700~response to oxygen-containing compound	GO:1901700~response to oxygen-containing compound
GO:0006979~response to oxidative stress	GO:0009698~phenylpropanoid metabolic process
GO:0010035~response to inorganic substance	GO:0006952~defense response
GO:0001101~response to acid chemical	GO:0001101~response to acid chemical
GO:0010243~response to organonitrogen compound	GO:0010243~response to organonitrogen compound
GO:1901698~response to nitrogen compound	GO:0055114~oxidation-reduction process
GO:0009611~response to wounding	GO:0006979~response to oxidative stress
GO:0006952~defense response	GO:1901698~response to nitrogen compound
GO:0009617~response to bacterium	GO:0006790~sulfur compound metabolic process
GO:0044711~single-organism biosynthetic process	GO:0044765~single-organism transport
GO:0010033~response to organic substance	GO:0044711~single-organism biosynthetic process
GO:0009414~response to water deprivation	GO:0010033~response to organic substance
GO:0009415~response to water	GO:0006082~organic acid metabolic process
GO:0010817~regulation of hormone levels	GO:0009725~response to hormone
GO:0009698~phenylpropanoid metabolic process	GO:0043207~response to external biotic stimulus
GO:0009725~response to hormone	GO:0032535~regulation of cellular component size
GO:0006082~organic acid metabolic process	GO:0090066~regulation of anatomical structure size
GO:0044281~small molecule metabolic process	GO:0071669~plant-type cell wall organization or biogenesis
GO:0042446~hormone biosynthetic process	GO:0044281~small molecule metabolic process
GO:0070887~cellular response to chemical stimulus	GO:0080167~response to karrikin
GO:0055085~transmembrane transport	GO:0010035~response to inorganic substance
GO:0043207~response to external biotic stimulus	GO:0009414~response to water deprivation
GO:0006790~sulfur compound metabolic process	GO:0009415~response to water
GO:0009850~auxin metabolic process	GO:0009812~flavonoid metabolic process
GO:0009812~flavonoid metabolic process	GO:0009617~response to bacterium
GO:0090066~regulation of anatomical structure size	GO:0055085~transmembrane transport
GO:0032535~regulation of cellular component size	GO:0072593~reactive oxygen species metabolic process
GO:0071495~cellular response to endogenous stimulus	GO:0044712~single-organism catabolic process
GO:0044765~single-organism transport	GO:0098542~defense response to other organism
GO:0009266~response to temperature stimulus	GO:0080134~regulation of response to stress
GO:0009409~response to cold	GO:0042493~response to drug
GO:0080134~regulation of response to stress	GO:0071555~cell wall organization
GO:1901615~organic hydroxy compound metabolic process	GO:0010876~lipid localization
GO:0006970~response to osmotic stress	GO:0006810~transport
	GO:0009409~response to cold
